# Supplementary material
Source: PubMed Central journal article supplement (PMC3220505)

## Supplemental Information

### Supplemental Table 1

*S. cerevisiae* strains and plasmids used in this study.

### Supplemental Figure 1

Nucleosome removal from the *PHO5* promoter does not require *ASF1*. Topoisomer analysis of repressed (R) and activated (A) *PHO5* gene circles (GC) in *asf1Δ* cells. The distribution shown is one of four measurements that have an average  $\Delta Lk$  value of 1.81 with a standard deviation of 0.25.

## Supplemental Table 1

*S. cerevisiae* strains and plasmids used in this study.

| Strain   | Parental Strain | Plasmid/<br>PCR | Relevant genotype                                                   | Source              |
|----------|-----------------|-----------------|---------------------------------------------------------------------|---------------------|
| YS18     |                 |                 | WT                                                                  | Hörz Lab            |
| yM7.8    | YS18            | pM67.6          | <i>pho80::HIS3</i>                                                  | Boeger et al., 2003 |
| yM19.2   | yM17.3          | pM70.1          | <i>pho80::HIS3, PHO5[GC, &lt;TATA&gt;]</i>                          | Boeger et al., 2003 |
| yM51.1   | YS18            | pM78.5          | <i>pho8::URA3</i>                                                   | This study          |
| yM52.2   | yM7.8           | pM78.5          | <i>pho80::HIS3, pho8::URA3</i>                                      | This study          |
| yM53.78  | yM51.1          | pM82.1          | <i>PHO8[GC, &lt;TATA&gt;]</i>                                       | This study          |
| yM54.9   | yM52.2          | pM82.1          | <i>pho80::HIS3, PHO8[GC, &lt;TATA&gt;]</i>                          | This study          |
| yM59.20  | yM53.78         | PCR             | <i>PHO8[GC, &lt;TATA&gt;], pho4::URA3</i>                           | This study          |
| yM63.19  | yM19.2          | pCM4.5          | <i>pho80::HIS3, PHO5[GC, &lt;TATA&gt;], pho4::URA3</i>              | Mao et al., 2010    |
| yM67.17  | yM63.19         | pCM5.2          | <i>pho80::HIS3, PHO5[GC, &lt;TATA&gt;], pho4-Δ75-99</i>             | Mao et al., 2010    |
| yM68.19  | yM63.19         | pCM6.3          | <i>pho80::HIS3, PHO5[GC, &lt;TATA&gt;], pho4-Δ79-90</i>             | Mao et al., 2010    |
| yM79.8   | yM63.19         | pCM39.1         | <i>pho80::HIS3, PHO5[GC, &lt;TATA&gt;], pho4-Δ78A</i>               | Mao et al., 2010    |
| yM83.5   | yM63.19         | pCM72.1         | <i>pho80::HIS3, PHO5[GC, &lt;TATA&gt;], pho4-Δ76-90</i>             | Mao et al., 2010    |
| yM86.1   | yM63.19         | pCM58.2         | <i>pho80::HIS3, PHO5[GC, &lt;TATA&gt;], pho4-Δ79-93</i>             | Mao et al., 2010    |
| yM88.1   | yM63.19         | pCM60.1         | <i>pho80::HIS3, PHO5[GC, &lt;TATA&gt;], pho4-Δ82-99</i>             | Mao et al., 2010    |
| yM89.1   | yM63.19         | pCM61.5         | <i>pho80::HIS3, PHO5[GC, &lt;TATA&gt;], pho4-Δ85-99</i>             | Mao et al., 2010    |
| yM96.1   | yM63.19         | pCM57.1         | <i>pho80::HIS3, PHO5[GC, &lt;TATA&gt;], pho4-Δ79-86</i>             | Mao et al., 2010    |
| yM120.2  | yM54.9          | pCM4.5          | <i>pho80::HIS3, PHO8[GC, &lt;TATA&gt;], pho4::URA3</i>              | This study          |
| yM121.1  | yM120.2         | pCM39.1         | <i>pho80::HIS3, PHO8[GC, &lt;TATA&gt;], pho4-Δ78A</i>               | This study          |
| yM122.2  | yM120.2         | pCM57.1         | <i>pho80::HIS3, PHO8[GC, &lt;TATA&gt;], pho4-Δ79-86</i>             | This study          |
| yM123.1  | yM120.2         | pCM61.5         | <i>pho80::HIS3, PHO8[GC, &lt;TATA&gt;], pho4-Δ85-99</i>             | This study          |
| yM124.8  | yM120.2         | pCM72.1         | <i>pho80::HIS3, PHO8[GC, &lt;TATA&gt;], pho4-Δ76-90</i>             | This study          |
| yM125.1  | yM120.2         | pCM5.2          | <i>pho80::HIS3, PHO8[GC, &lt;TATA&gt;], pho4-Δ75-99</i>             | This study          |
| yM126.1  | yM120.2         | pCM58.2         | <i>pho80::HIS3, PHO8[GC, &lt;TATA&gt;], pho4-Δ79-93</i>             | This study          |
| yM127.1  | yM120.2         | pCM60.1         | <i>pho80::HIS3, PHO8[GC, &lt;TATA&gt;], pho4-Δ82-99</i>             | This study          |
| yM129.10 | yM120.2         | pCM6.3          | <i>pho80::HIS3, PHO8[GC, &lt;TATA&gt;], pho4-Δ79-90</i>             | This study          |
| CBY11.4  | yM53.78         | PCR             | <i>PHO8[GC, &lt;TATA&gt;], asf1::KanMX</i>                          | This study          |
| CBY12.1  | yM54.9          | PCR             | <i>pho80::HIS3, PHO8[GC, &lt;TATA&gt;], asf1::KanMX</i>             | This study          |
| CBY14.5  | yM53.78         | PCR             | <i>PHO8[GC, &lt;TATA&gt;], snf2::KanMX</i>                          | This study          |
| CBY15.5  | yM54.9          | PCR             | <i>pho80::HIS3, PHO8[GC, &lt;TATA&gt;], snf2::KanMX</i>             | This study          |
| CBY16.1  | yM59.20         | PCR             | <i>PHO8[GC, &lt;TATA&gt;], pho4::URA3, snf2::KanMX</i>              | This study          |
| yE21.3   | yE1.1           | pM51.1          | <i>MATa, pho5::URA3, pho80::LEU2</i>                                | Mao et al., 2010    |
| yE22.1   | yE2.1           | pM51.1          | <i>MATa, pho5::URA3, pho80::LEU2</i>                                | This study          |
| yC44.1   | yM19.2          | PCR             | <i>pho80::HIS3, PHO5[GC, &lt;TATA&gt;], snf2::KanMX</i>             | This study          |
| yC45.3   | yM63.19         | PCR             | <i>pho80::HIS3, PHO5[GC, &lt;TATA&gt;], pho4::URA3, snf2::KanMX</i> | This study          |
| yC56.11  | yE21.3          | pM67.6          | <i>MATa, pho5::URA3, pho80::HIS3</i>                                | Mao et al., 2010    |
| yC57.10  | yE22.1          | pM67.6          | <i>MATa, pho5::URA3, pho80::HIS3</i>                                | This study          |
| yC58.8   | yC56.11         | pM70.1          | <i>pho80::HIS3, PHO5[GC, &lt;TATA&gt;]</i>                          | Mao et al., 2010    |
| yC59.11  | yC57.10         | pM70.1          | <i>pho80::HIS3, PHO5[GC, &lt;TATA&gt;]</i>                          | This study          |
| yC72.1   | yC58.8          | pCM90.1         | <i>pho80::HIS3, PHO5[GC, &lt;TATA&gt;], pho4::URA3</i>              | Mao et al., 2010    |
| yC87.2   | yC59.11         | pCM90.1         | <i>pho80::HIS3, PHO5[GC, &lt;TATA&gt;], pho4::URA3</i>              | This study          |
| yC117.1  | yC58.8          | PCR             | <i>pho80::HIS3, PHO5[GC, &lt;TATA&gt;], asf1::KanMX</i>             | This study          |
| yC118.1  | yC59.11         | PCR             | <i>pho80::HIS3, PHO5[GC, &lt;TATA&gt;], asf1::KanMX</i>             | This study          |
| yC119.1  | yC72.1          | PCR             | <i>pho80::HIS3, PHO5[GC, &lt;TATA&gt;], pho4::URA3, asf1::KanMX</i> | This study          |
| yC120.1  | yC87.2          | PCR             | <i>pho80::HIS3, PHO5[GC, &lt;TATA&gt;], pho4::URA3, asf1::KanMX</i> | This study          |
| yC104.34 | yM52.2          | pCM110.1        | <i>pho80::HIS3, PHO8[PC, &lt;TATA&gt;]</i>                          | This study          |
| yC192.1  | yC104.34        | pCM4.5          | <i>pho80::HIS3, PHO8[PC, &lt;TATA&gt;], pho4::URA3</i>              | This study          |
| yJL4.4   | yC57.10         | pM50.1          | <i>MATa, pho80::HIS3</i>                                            | This study          |
| yJL5.7   | yC56.11         | pM50.1          | <i>MATa, pho80::HIS3</i>                                            | This study          |
| yJL6.4   | yJL4.4          | pM78.5          | <i>MATa, pho80::HIS3, pho8::URA3</i>                                | This study          |
| yJL7.4   | yJL5.7          | pM78.5          | <i>MATa, pho80::HIS3, pho8::URA3</i>                                | This study          |
| yJL8.1   | yJL6.4          | pJL2.2          | <i>MATa, pho80::HIS3, PHO8p:CFP</i>                                 | This study          |
| yJL9.1   | yJL7.4          | pJL3.4          | <i>MATa, pho80::HIS3, PHO8p:YFP</i>                                 | This study          |
| yJL10.1  | yJL8.1 x yJL9.1 | Diploid         | <i>MATa/MATa, pho80::HIS3/pho80::HIS3, PHO8p:CFP/PHO8p:YFP</i>      | This study          |
| yJL12.1  | yJL9.1          | pCM4.5          | <i>MATa, pho80::HIS3, PHO8p:YFP, pho4::URA3</i>                     | This study          |
| yE1.1    | EY1655          | pCM43.12        | <i>PHO5p:YFP-HIS3, pho80::LEU2</i>                                  | Mao et al., 2010    |
| yE3.1    | yE1.1           | pCM4.5          | <i>PHO5p:YFP-HIS3, pho80::LEU2, pho4::URA3</i>                      | Mao et al., 2010    |

# Supplemental Figure 1

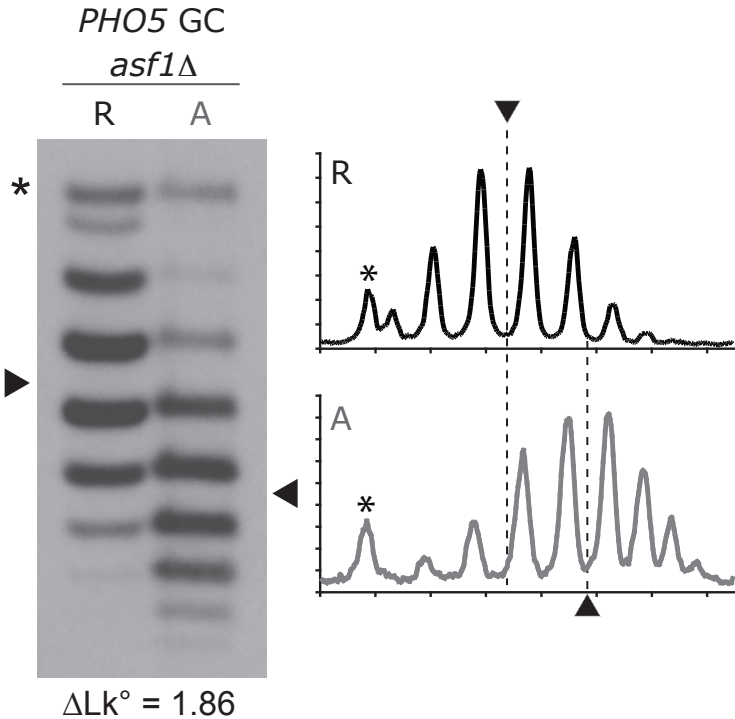

Supplement: supp_M111.289918_jbc.M111.289918-1.pdf [file supp_M111.289918_jbc.M111.289918-1.pdf]
